# Supplementary material for: A Companion Converter for Immersive Molecular Dynamics in Virtual Reality to Save Time on Creating Simulation Files
Source: Preprints.org preprint supplement (doi:10.20944/preprints202103.0784.v1), 2021-03-31
Supplement: Supplementary file 3 [file supplementary]

Archive with 2 entries (2 files):
- Manuscript Supporting Information Narupa.pdf
- __MACOSX/._Manuscript Supporting Information Narupa.pdf
